# Supplementary material for: Deriving effective vaccine allocation strategies for pandemic influenza: Comparison of an agent-based simulation and a compartmental model
Source: PubMed Central journal article supplement (PMC5319753; doi:10.1371/journal.pone.0172261), 2017-02-21
Supplement: pone.0172261.s001.pdf [file pone.0172261.s001.pdf]

---

| <b>i \ j</b> | <b>0-4</b> | <b>5-18</b> | <b>19-29</b> | <b>30-64</b> | <b>65+</b> |
|--------------|------------|-------------|--------------|--------------|------------|
| <b>0-4</b>   | 2.98       | 32.69       | 4.71         | 0.20         | 0.62       |
| <b>5-18</b>  | 9.62       | 35.49       | 13.36        | 48.31        | 8.44       |
| <b>19-29</b> | 2.41       | 23.28       | 1.26         | 0.55         | 0.40       |
| <b>30-64</b> | 0.03       | 22.75       | 0.15         | 1.56         | 2.43       |
| <b>65+</b>   | 0.35       | 16.13       | 0.43         | 9.85         | 0.48       |

---
