# Supplementary material for: Deriving effective vaccine allocation strategies for pandemic influenza: Comparison of an agent-based simulation and a compartmental model
Source: PubMed Central journal article supplement (PMC5319753; doi:10.1371/journal.pone.0172261), 2017-02-21
Supplement: pone.0172261.s002.pdf [file pone.0172261.s002.pdf]

| <b>Age Group</b>   | FluTe [1] | SEIR | Asian A (H2N2) [2] |
|--------------------|-----------|------|--------------------|
| Preschool children | 38%       | 39%  | 35%                |
| School children    | 53%       | 56%  | 55%                |
| Young adults       | 26%       | 30%  | 25%                |
| Adults             | 28%       | 29%  | 20%                |
| Seniors            | 23%       | 26%  | 14%                |
| <b>Overall</b>     | 33%       | 35%  | 31%                |

## References

- [1] Chao DL, Halloran ME, Obenchain VJ, Longini Jr IM. FluTE, a publicly available stochastic influenza epidemic simulation model. *PLoS Computational Biology*. 2010;6(1):e1000656.
- [2] Longini IM, Ackerman E, Elveback LR. An optimization model for influenza A epidemics. *Mathematical Biosciences*. 1978;38(1-2):141–157.
